# Supplementary material
Source: PubMed Central journal article supplement (PMC6509018)
Supplement: NIHMS1511666-supplement-SDC.pdf [file NIHMS1511666-supplement-SDC.pdf]

Table S1. Primary liver disease etiology of liver transplant waitlist candidates between January 1, 2003 and October 1, 2015, overall and stratified by age and race

|                                      | All Candidates | Younger White   | Younger AA   | Older White     | Older AA     | P value |
|--------------------------------------|----------------|-----------------|--------------|-----------------|--------------|---------|
| Primary Liver Disease Classification | N=101 805      | N=62 822 (61.7) | N=8698 (8.5) | N=27 378 (26.9) | N=2907 (2.9) |         |
|                                      | N (%)          | N (%)           | N (%)        | N (%)           | N (%)        | <0.0001 |
| Nonalcoholic Fatty Liver Disease     | 8065 (7.9)     | 3763 (6.0)      | 96 (1.1)     | 4151 (15.2)     | 55 (1.9)     |         |
| Alcoholic Hepatitis                  | 16 224 (15.9)  | 11 002 (17.5)   | 537 (6.2)    | 4524 (16.5)     | 161 (5.5)    |         |
| Autoimmune Disease                   | 7398 (7.3)     | 4551 (7.3)      | 1170 (13.5)  | 1532 (5.6)      | 145 (5.0)    |         |
| Malignancy                           | 8291 (8.1)     | 4072 (6.5)      | 641 (7.4)    | 3170 (11.6)     | 408 (14.0)   |         |
| Viral Hepatitis                      | 37 731 (37.1)  | 25 009 (39.8)   | 3824 (44.0)  | 7231 (26.4)     | 1667 (57.3)  |         |
| Other                                | 24 086 (23.7)  | 14 418 (23.0)   | 2428 (27.9)  | 6769 (24.7)     | 471 (16.2)   |         |
